# Supplementary material for: Critical numbers of neural crest cells are required in the pathways from the neural tube to the foregut to ensure complete enteric nervous system formation
Source: Oxford University Press journal article supplement (doi:10.1242/dev.017418), 2008-04-03
Supplement: dev017418-sup-017418-tables1.pdf [file dev017418-sup-017418-tables1.pdf]

**Table S1. Quantitative image analysis of ENS networks following 3-6 ablation and grafting of one somite length of vagal, sacral or trunk neural tube (see Fig. 5)**

|                            | Duodenum | Small intestine | Umbilicus | Cecal buds | Hindgut |
|----------------------------|----------|-----------------|-----------|------------|---------|
| A (3-6 ablated + Q3)       | 62.4     | 59.4            | 47.4      | 56.0       | 55.0    |
| B (3-6 ablated + Q Sacral) | 65.5     | 56.3            | 38.7      | 50.9       | 43.4    |
| C (3-6 ablated + Q Trunk)  | 54.5     | 62.7            | 51.2      | 56.8       | 37.4    |

To determine whether the densities of the ENS networks were significantly different between the three experimental groups (3-6 ablated + Q3, 3-6 ablated + Q sacral, 3-6 ablated + Q trunk), computerised image analysis was performed. Images were saved as Jpegs (Adobe Photoshop) and analysed using ImageJ software ([www.nih.gov](http://www.nih.gov)). The percentage area covered by TuJ1 immunohistochemical staining was measured for each region of the gut (duodenum, small intestine, umbilicus, cecal buds and hindgut) after isolating the green channel (threshold=26). Paired Student's *t*-tests were performed. Differences between the densities of ENS networks within the gut regions of each group were not statistically significant (A versus B,  $P=0.114$ ; A versus C,  $P=0.434$ ; B versus C,  $P=0.739$ ).
